# Supplementary material for: Nonlinear age effects in tactile processing from early childhood to adulthood
Source: PubMed Central journal article supplement (PMC9304836; doi:10.1002/brb3.2644), 2022-06-08
Supplement: BRB3-12-e2644-s001.pdf [file BRB3-12-e2644-s001.pdf]

## Supplementary Material

**Appendix Table 1.** Polynomial age model coefficients and significance measures.

| <i>Task</i>  | <i>Model</i>     | $\beta$  | <i>Std. Error</i> | <i>t</i> | <i>p-value</i> |
|--------------|------------------|----------|-------------------|----------|----------------|
| <i>RT</i>    | Constant         | 1607.534 | 117.249           | 13.710   | >0.001         |
|              | Age              | -262.420 | 34.381            | -7.633   | >0.001         |
|              | Age <sup>2</sup> | 16.416   | 2.932             | 5.599    | >0.001         |
|              | Age <sup>3</sup> | -0.335   | 0.075             | -4.465   | >0.001         |
| <i>RTVar</i> | Constant         | 821.030  | 114.044           | 7.199    | >0.001         |
|              | Age              | -217.991 | 33.441            | -6.519   | >0.001         |
|              | Age <sup>2</sup> | 19.117   | 2.852             | 6.703    | >0.001         |
|              | Age <sup>3</sup> | -0.501   | 0.073             | -6.856   | >0.001         |
| <i>sqAD</i>  | Constant         | 335.310  | 55.731            | 6.017    | >0.001         |
|              | Age              | -56.651  | 15.842            | -3.576   | >0.001         |
|              | Age <sup>2</sup> | 3.680    | 1.328             | 2.772    | 0.006          |
|              | Age <sup>3</sup> | -0.077   | 0.034             | -2.281   | 0.024          |
| <i>smAD</i>  | Constant         | 170.984  | 12.136            | 14.089   | >0.001         |
|              | Age              | -5.073   | 0.833             | -6.088   | >0.001         |
| <i>TOJ</i>   | Constant         | 176.406  | 28.529            | 6.184    | >0.001         |
|              | Age              | -13.164  | 4.438             | -2.966   | 0.004          |
|              | Age <sup>2</sup> | 0.311    | 0.154             | 2.024    | 0.046          |
| <i>DD</i>    | Constant         | 508.145  | 69.673            | 7.293    | >0.001         |
|              | Age              | -77.298  | 19.987            | -3.867   | >0.001         |
|              | Age <sup>2</sup> | 4.728    | 1.684             | 2.807    | 0.006          |
|              | Age <sup>3</sup> | -0.096   | 0.043             | -2.241   | 0.027          |

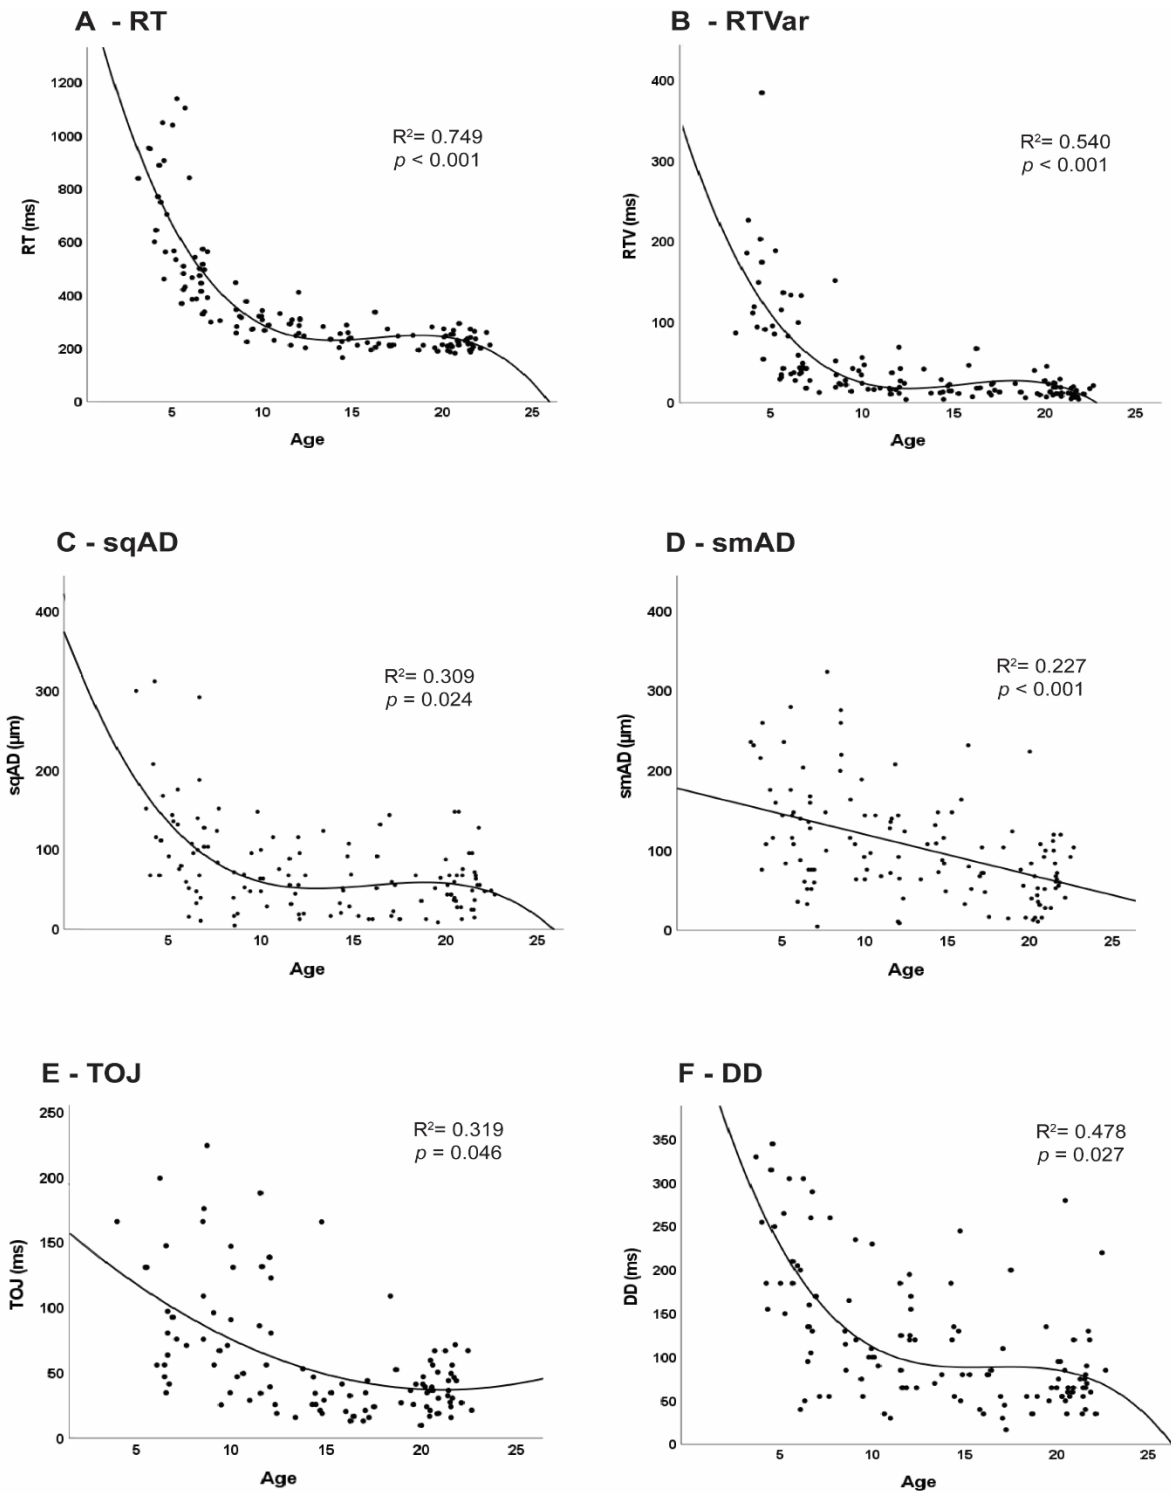

**Appendix Figure 1. Polynomial age effects in tactile processing from early childhood to adulthood.** Polynomial models were fitted for each task as a function of age. Data points represent individual participants and curves represent best fitted models. **A**, Reaction time (ms) **B**, Reaction time variability (ms) **C**, Sequential amplitude discrimination ( $\mu\text{m}$ ) **D**, Simultaneous amplitude discrimination ( $\mu\text{m}$ ) **E**, Temporal order judgement (ms) **F**, Duration discrimination (ms).

**Appendix Table 2.** Task pair ratios and age models coefficients and significance measures.

| <i>Task Ratio</i> | <i>Model</i> | <i><math>\beta</math></i> | <i>Std. Error</i> | <i>t</i> | <i>p-value</i> |
|-------------------|--------------|---------------------------|-------------------|----------|----------------|
| <i>RT/RTVar</i>   | Constant     | 4.852                     | 1.567             | 3.097    | 0.002          |
|                   | Age          | 0.696                     | 0.109             | 6.370    | >0.001         |
| <i>RT/sqAD</i>    | Constant     | 9.436                     | 1.610             | 5.860    | >0.001         |
|                   | Age          | -0.157                    | 0.108             | -1.448   | 0.150          |
| <i>RT/smAD</i>    | Constant     | 7.032                     | 1.636             | 4.299    | >0.001         |
|                   | Age          | -0.104                    | 0.110             | -0.942   | 0.348          |
| <i>RT/TOJ</i>     | Constant     | 4.492                     | 1.107             | 4.058    | >0.001         |
|                   | Age          | 0.157                     | 0.070             | 2.235    | 0.028          |
| <i>RT/DD</i>      | Constant     | 3.551                     | 0.454             | 7.821    | >0.001         |
|                   | Age          | -0.001                    | 0.030             | -0.029   | 0.977          |
| <i>sqAD/smAD</i>  | Constant     | 0.635                     | 0.338             | 1.876    | 0.063          |
|                   | Age          | 0.035                     | 0.022             | 1.552    | 0.123          |
| <i>sqAD/TOJ</i>   | Constant     | 0.893                     | 0.496             | 1.799    | 0.075          |
|                   | Age          | 0.050                     | 0.031             | 1.594    | 0.114          |
| <i>TOJ/DD</i>     | Constant     | 16.168                    | 0.951             | 17.007   | >0.001         |
|                   | Age          | -1.911                    | 1.228             | -1.556   | 0.123          |
